# Supplementary material for: The effect of cell geometry on polarization in budding yeast
Source: PLOS journal article supplement (doi:10.1371/journal.pcbi.1006241), 2018-06-11
Supplement: S11 (10.1371/journal.pcbi.1006241.s011) [file journal.pcbi.1006241.s011]

### S3 Model Mechanistic model of polarisome formation.

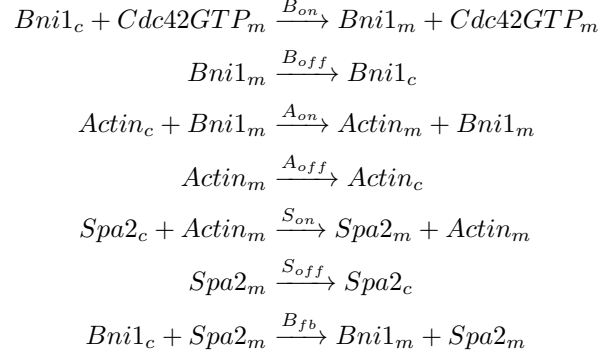

Added feedback between Cdc42 polarization and polarisome:

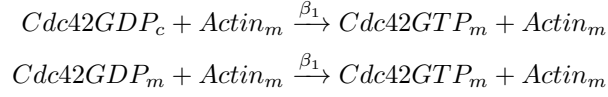

| Parameter | Value                         | Description                       |
|-----------|-------------------------------|-----------------------------------|
| $D_m$     | $0.0053 \mu m^2 s^{-1}$       | Diffusion constant on membrane    |
| $D_a$     | $0.0 \mu m^2 s^{-1}$          | No actin diffusion on membrane    |
| $D_c$     | $50 \mu m^2 s^{-1}$           | Diffusion constant in cytoplasm   |
| $R$       | $2 \mu m$                     | Radius of cell                    |
| $N_B$     | 1000                          | Total number of Bni1 molecules    |
| $N_S$     | 5000                          | Total number of Spa2 molecules    |
| $N_A$     | 40                            | Total number of Actin cables      |
| $B_{on}$  | $0.000256 \mu m^3 s^{-1}$     | Recruitment of Bni1 by Cdc42      |
| $B_{off}$ | $22.5 s^{-1}$                 | Detachment of Bni1 from membrane  |
| $S_{on}$  | $4.55 \mu m^3 s^{-1}$         | Recruitment of Spa2 by Actin      |
| $S_{off}$ | $0.35 s^{-1}$                 | Detachment of Spa2 from membrane  |
| $A_{on}$  | $0.197 \mu m^3 s^{-1}$        | Recruitment of Actin by Bni1      |
| $A_{off}$ | $1.57 * 500 / (500 + Spa2_m)$ | Detachment of Actin from membrane |
| $B_{fb}$  | $0.0304 \mu m^3 s^{-1}$       | Recruitment of Bni1 by Spa2       |
| $\beta_1$ | $0.266 \mu m^3 s^{-1}$        | Recruitment of Cdc42 by Actin     |
